# Supplementary material for: The impact of HIV on presentation and outcome of bacterial sepsis and other causes of acute febrile illness in Gabon
Source: Springer Nature journal article supplement (doi:10.1007/s15010-015-0753-2), 2015-03-10
Supplement: MOESM3 [file 9302704]

Huson MA\*, Kalkman R, Stolp SM, Janssen S, Alabi AS, Beyeme JO, van der Poll T, Grobusch MP. The impact of HIV on presentation and outcome of bacterial sepsis and other causes of acute febrile illness in Gabon. *Infection*

\*Correspondence: Academic Medical Center, Meibergdreef 9, room G2-105, 1105 AZ Amsterdam, The Netherlands, [m.a.huson@amc.uva.nl](mailto:m.a.huson@amc.uva.nl)

**Online Resource 3: Clinical symptoms and signs of patients admitted to the Albert Schweitzer hospital with acute febrile illness**

|                             | Total<br>n=382       | HIV+<br>n=77         | HIV-<br>n=305       | p-value            | OR<br>(95% CI)                     |
|-----------------------------|----------------------|----------------------|---------------------|--------------------|------------------------------------|
| <b>Clinical symptoms</b>    |                      |                      |                     |                    |                                    |
| Headache                    | 230 (60.2)           | 40 (51.9)            | 190 (62.3)          | 0.09               | 0.65<br>(0.40-1.08)                |
| Vomiting                    | 153 (40.1)           | 28 (36.4)            | 125 (41.0)          | 0.46               | 0.82<br>(0.49-1.38)                |
| Abdominal pain              | 149 (39.0)           | 28 (36.4)            | 121 (39.7)          | 0.59               | 0.87<br>(0.52-1.46)                |
| Cough                       | 118 (30.9)           | 39 (50.6)            | 79 (25.9)           | <b>&lt; 0.0001</b> | <b>2.94</b><br><b>(1.75-4.91)</b>  |
| Shortness of breath         | 99 (25.9)            | 29 (37.7)            | 70 (23.0)           | <b>0.009</b>       | <b>2.03</b><br><b>(1.19-3.46)</b>  |
| Diarrhea                    | 96 (25.1)            | 22 (28.6)            | 74 (24.3)           | 0.44               | 1.25<br>(0.71-2.19)                |
| Weight loss                 | 92 (24.1)            | 45 (58.4)            | 47 (15.4)           | <b>&lt; 0.0001</b> | <b>7.72</b><br><b>(4.46-13.38)</b> |
| Joint pain                  | 87 (22.8)            | 7 (9.1)              | 80 (26.2)           | <b>0.001</b>       | <b>0.28</b><br><b>(0.12-0.64)</b>  |
| Urinary tract symptoms      | 51 (13.4)            | 9 (11.7)             | 42 (13.8)           | 0.63               | 0.83<br>(0.38-1.79)                |
| Night sweats                | 22 (5.8)             | 11 (14.3)            | 11 (3.6)            | 0.91               | 1.04<br>(0.51-2.12)                |
| Altered mental status       | 15 (3.9)             | 2 (2.6)              | 13 (4.3)            | 0.50               | 0.60<br>(0.13-2.71)                |
| Reproductive tract symptoms | 14 (3.7)             | 1 (1.3)              | 13 (4.3)            | 0.22               | 0.30<br>(0.04-2.30)                |
| Skin symptoms               | 9 (2.4)              | 3 (3.9)              | 6 (2.0)             | 0.32               | 2.02<br>(0.49-8.27)                |
| <b>Clinical signs</b>       |                      |                      |                     |                    |                                    |
| Temperature                 | 38.9<br>(38.3-39.5)  | 38.6<br>(38.3-39.4)  | 39.0<br>(38.3-39.5) | 0.22               |                                    |
| Heart rate                  | 104.5<br>(92-115)    | 110<br>(101-118)     | 103<br>(92-113)     | <b>0.001</b>       |                                    |
| Respiratory rate            | 28<br>(24-32.5)      | 30<br>(24-36)        | 28<br>(24-32)       | 0.35               |                                    |
| Hemoglobin (g/dl)           | 11.4<br>(9.8-13)     | 9.7<br>(8.0-11.2)    | 11.8<br>(10.2-13.2) | <b>&lt; 0.0001</b> |                                    |
| Leukocyte count (cells/mm3) | 6.95<br>(4.275-10.6) | 6.8<br>(4.6-10.6)    | 7<br>(4.25-10.55)   | 0.91               |                                    |
| Platelets (109/L)           | 158<br>(107-227.5)   | 189<br>(135.5-292.5) | 149.5<br>(101-216)  | <b>0.0008</b>      |                                    |

For categorical variables the absolute number is given with the percentage, and for continuous variables medians are given with their interquartile range. We used  $\chi^2$  tests for comparisons of categorical variables, Mann Whitney U tests to assess differences for non-normally distributed continuous variables, and unpaired t-tests for normally distributed variables.

Abbreviations: OR: Odds ratio, CI: confidence interval
